# Supplementary material
Source: PubMed Central journal article supplement (PMC3243611)

## Supplementary Information

### **The human microcephaly protein STIL interacts with CPAP and is required for procentriole formation**

Chieh-Ju C. Tang<sup>1</sup>, Shin-Yi Lin<sup>1</sup>, Wen-Bin Hsu<sup>1</sup>, Yi-Nan Lin<sup>1</sup>, Chien-Ting Wu<sup>1</sup>,  
Yu-Chih Lin<sup>1</sup>, Ching-Wen Chang<sup>1</sup>, Kuo-Sheng Wu<sup>2</sup>, and Tang K. Tang<sup>1,#</sup>

<sup>1</sup>Institute of Biomedical Sciences, Academia Sinica, Taipei 11529, Taiwan

<sup>2</sup>Institute of Biochemistry and Molecular Biology, National Yang Ming University, Taipei 11221, Taiwan

Supplementary Information includes supplementary figure legends, 14 supplementary figures and 3 supplementary movies.

#### **Supplementary figure legends**

Figure S1. Model showing the role of STIL involved in the early event of procentriole assembly in human cells. See text for detail. For simplicity, only one parent centriole is shown.

Figure S2. Transiently expressed GFP-STIL (A, C, E) or Flag-STIL (B, D) induces centriole amplification in HEK293T (A, B), HeLa (C, D), and bovine aortic endothelial cells (E). Forty-eight hours after transfection, cells were fixed and stained with indicated antibodies. The GFP-STIL proteins were directly observed by confocal fluorescent microscopy. DNA was counterstained with DAPI.

Figure S3. No direct interaction between STIL and hSAS6 was evidenced by a yeast two-hybrid assay. (A, B) Testing the direct interaction of hSAS6-N (bait, residues 1-198, A) and hSAS6-C (bait, residues 172-657, B) with various portions of STIL (prey) using a liquid assay for  $\beta$ -galactosidase activity in a yeast two-hybrid assay. (C, D) Testing the direct interaction of STIL-N (bait, residues 1-634, C) and STIL-C (bait, residues 866-1288, D) with various portions of hSAS6 (prey) using a liquid assay for  $\beta$ -galactosidase activity.

Figure S4. (A) No direct interaction between STIL and hSAS6 was demonstrated by GST pulldown assay. The full-length coding sequences derived from hSAS6 and STIL

were *in vitro* transcribed and translated into each corresponding <sup>35</sup>S-methionine-labeled protein as described in Methods. (A-a) Various GST-tagged recombinant proteins used for GST pull-down assays were affinity purified and stained with Coomassie blue (C.B.). The <sup>35</sup>S-methionine-labeled proteins were then incubated with GST (negative control), GST-STIL (1-628), GST-STIL (620-1288), or full length GST-hSAS6 on beads and analyzed by SDS-PAGE and autoradiography (A-b). (B) *Drosophila* Ana2 directly interacts with dSAS4, an orthologue of human CPAP. GST-Ana2 was affinity purified (B-a) and incubated with various <sup>35</sup>S-Methionine-labeled proteins (dSAS4, dSAS6, and Ana2) and analyzed by SDS-PAGE and autoradiography (B-b).

Figure S5. Verification and mapping of the interaction domains between STIL and CPAP. GST-CPAP-CP1 (residues 1-450), GST-CPAP-CP4-10 (residues 423-1070), and GST-CPAP-CP3 (residues 895-1338) were affinity purified and stained with Coomassie blue (A). HEK 293T cells were transfected with each specific GFP-tagged construct (Plk4, STIL, Cep135, and Cep152). Twenty-four hours after transfection, equal amounts of various GST-CPAP truncated proteins were used to pull down the indicated transfected proteins (B). (C) To map the CPAP-interacting domain in STIL, GST-CPAP-CP3 was used to pull down the interacting STILs prepared from the lysates of various Flag-STIL-transfected cells.

Figure S6. A direct protein-protein interaction between STIL and CPAP was demonstrated by GST pulldown assay (A) and yeast two-hybrid assay (B). (A) The full-length coding sequences derived from Cep135, hSAS6 and STIL were *in vitro* transcribed and translated into each corresponding <sup>35</sup>S-methionine-labeled protein as described in Methods. The <sup>35</sup>S-methionine-labeled proteins were then incubated with either GST (negative control) or GST-CPAP-CP3 on beads and analyzed by SDS-PAGE and autoradiography. (B) Interaction between CPAP-CP3 (bait) with various portions of STIL (prey) using a liquid assay for  $\beta$ -galactosidase activity in a yeast two-hybrid assay. The interaction between CPAP and STIL was evidenced by the mating colonies growing on QDO plates (SD minimal medium, -Trp, -Leu, -Ade, and -His) and the activation of  $\beta$ -galactosidase activity. p53 (bait) and SV40-large T-Ag (prey) were used as a positive control.

Figure S7. Exogenous GFP-STIL forms a complex with endogenous CPAP and hSAS6 *in vivo*. HEK293T cells were transfected with GFP-STIL construct. Twenty-four hours after transfection, the cell lysates were immunoprecipitated with a non-relevant normal IgG (Mock), anti-hSAS6 (A), anti-CPAP (B), or anti-GFP

antibodies (C) and analyzed by western blotting using indicated antibodies.

Figure S8. Testing the interaction of truncated CPAP-CP3 (wild type) or CPAP-CP3 (E1235V) (bait) with various portions of STIL (prey) using a liquid assay for  $\beta$ -galactosidase activity in a yeast two-hybrid assay. The positive interaction was evidenced by the mating colonies growing on QDO plates (SD minimal medium, -Trp, -Leu, -Ade, and -His) and the activation of  $\beta$ -galactosidase activity. p53 (bait) and SV40-large T-Ag (prey) were used as a positive control.

Figure S9. STIL siRNAs-treated cells analyzed with anti-STIL-441a (A and B) or anti-STIL-442a (C) antibody. U2OS cells were transfected with control siRNA (siControl) or STIL siRNAs (siSTIL-1, siSTIL-2, and siSTIL-3) as described in Figure 5. After transfection, cells were analyzed by immunofluorescence confocal microscopy using indicated antibodies (A and C) or by immunoblotting (B). DNA was counterstained by DAPI.  $\beta$ -actin was used as a loading control (B).

Figure S10. The effects of siSTIL-treated cells in a 6-days follow-up analysis. (A) FACS analysis of siSTIL-treated cells. U2OS cells were transfected with siControl or siSTIL duplexes and analyzed by FACS at different time points. (B) Mitotic index of siControl and siSTIL-treated cells. The mitotic cells, labeled positive by phospho-histone H3 (P-H3) antibody, were counted and plotted on B. Quantification of centrioles (C) and growth curve analysis (D) in siControl and siSTIL-treated cells.

Figure S11. Live mCherry- $\alpha$ -tubulin expressing cells were transfected with either siControl (A) or siSTIL (B). 60 h after transfection, live cell images were taken with a Lecia DMI6000 inverted fluorescence microscope at the indicated times (minutes). In siSTIL-treated experiments, a mitotic cell divides to produce two separate cells (a), a large polyploid cell (b), or three daughter cells (c).

Figure S12. STIL depletion does not perturb the localization of endogenous Plk4 (A) and Cep152 (B) to the centriole. U2OS cells were transfected with siRNAs against STIL. Two days after transfection, cells were treated with aphidicolin for another day, followed by immunofluorescence staining using indicated antibodies (A, B). Quantification of centriolar signals of Plk4 (A, right panel) and Cep152 (B, right panel) in siControl and siSTIL treated cells were shown. Values are means of three experiments with s.d. bars ( $n = 100$  cells).

Figure S13. Plk4 depletion impairs centriolar localization of STIL (A) and inhibits

GFP-STIL-induced centriole amplification (B). (A) U2OS cells were transfected with siRNA duplexes against Plk4 for two days, followed by aphidicolin treatment for 18 hours. After treatment, the cells were collected 6 hours after aphidicolin release and then processed for immunofluorescence staining using indicated antibodies. A quantification of the centriolar signals of STIL in siControl and siPlk4-treated cells is shown in A (right panel). Values are means of three experiments with s.d. bars ( $n = 100$  cells). (B) GFP-STIL-inducible cells were transfected with siPlk4 duplexes for 1 day before GFP-STIL expression was induced for another day. These cells were then treated with aphidicolin and processed for immunofluorescence staining as described above. Histogram illustrating as percentages the centriole numbers in siPlk4-treated GFP-STIL-inducible cells (B, right panel). Error bars represent mean  $\pm$  s.d. of 100 cells from three independent experiments.

Figure S14. GFP-STIL overexpression appears not to affect Plk4 kinase activity. Plk4-myc was cotransfected with GFP or GFP-STIL into HEK293T cells. 24 hours after transfection, Plk4-myc was immunoprecipitated by anti-myc antibody and the immunoprecipitated Plk4 was used to carry out an *in vitro* kinase assay as described in Materials and methods.

### Supplementary Movies

Live mCherry- $\alpha$ -tubulin expressing cells were transfected with siSTIL. Sixty hours after transfection, live cell images were taken using a Lecia DMI6000 inverted fluorescence microscope at the indicated times (minutes). A siSTIL-treated mitotic cell divides to produce two separate cells (Supplementary Movie S1), a large polyploid cell (Supplementary Movie S2), or three daughter cells (Supplementary Movie S3).

Fig. S1

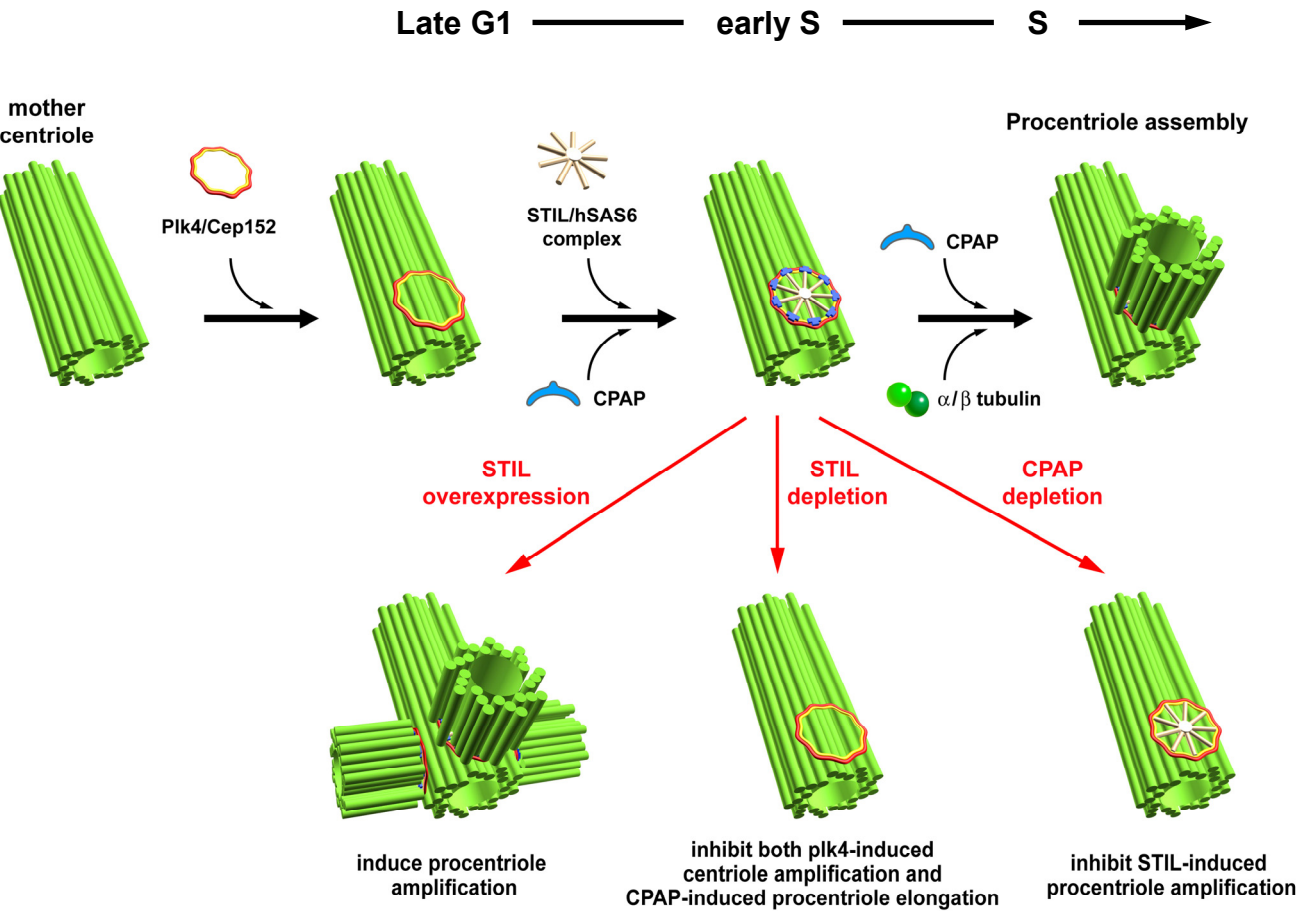

Fig. S2

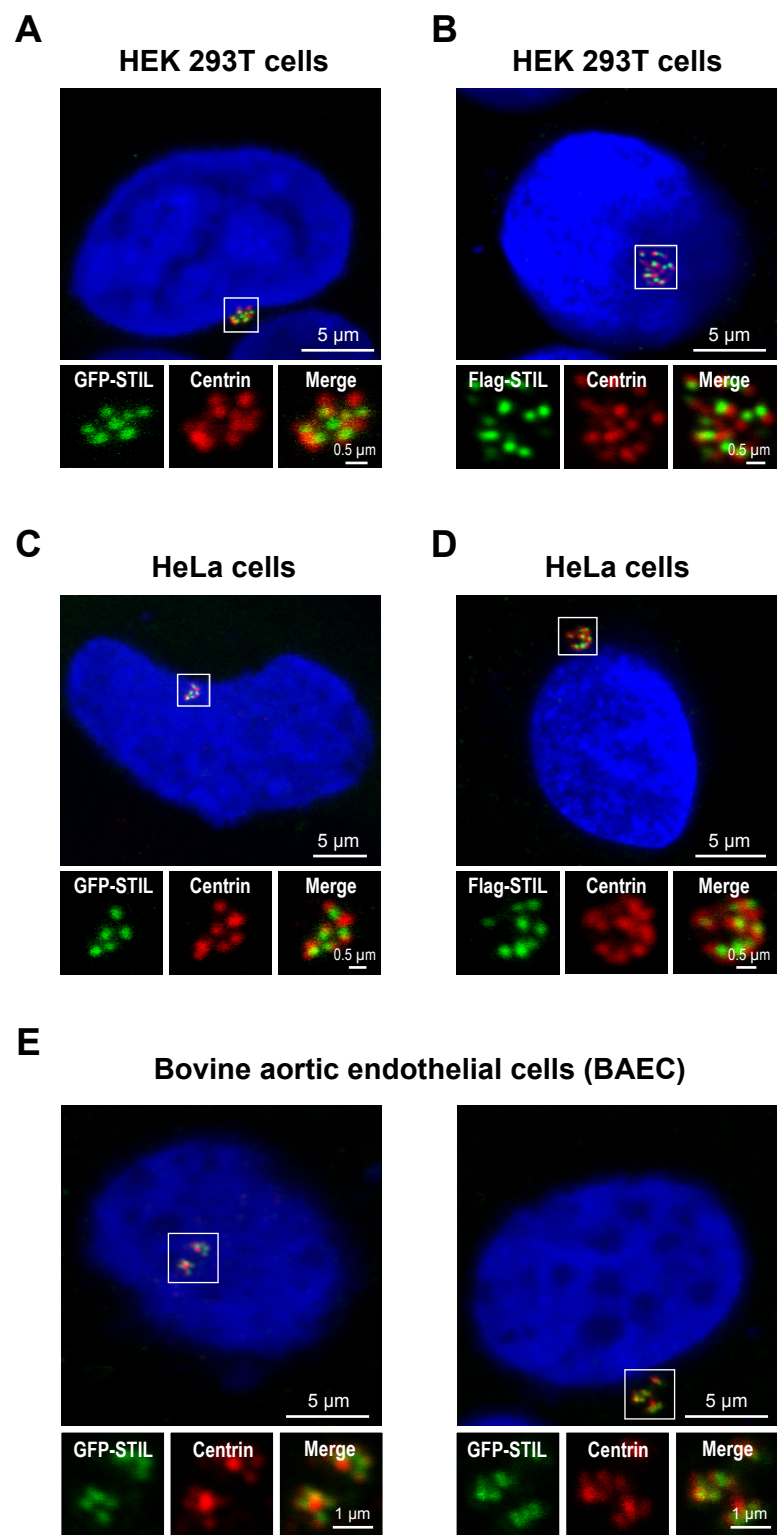

Fig. S3

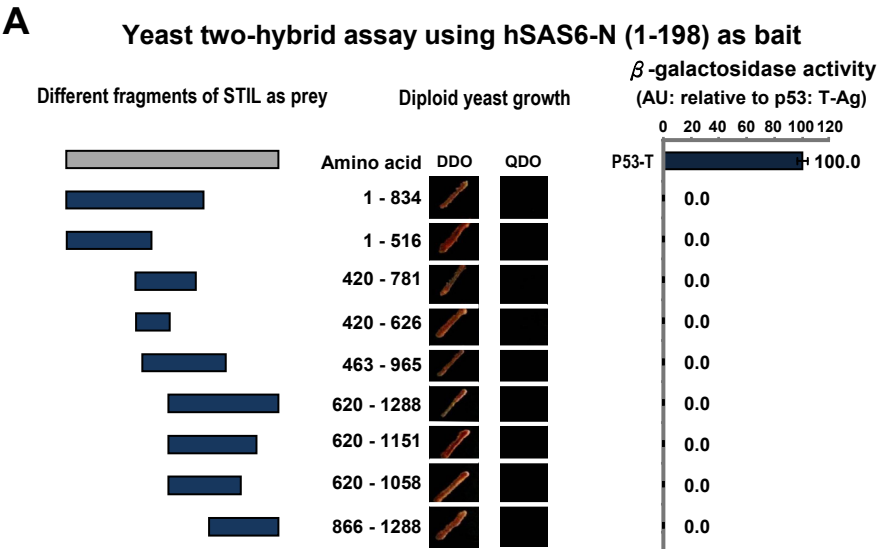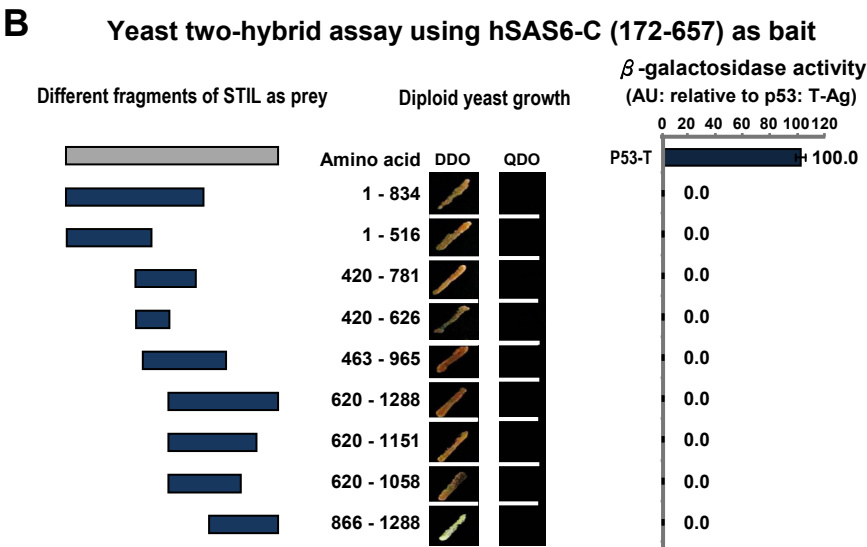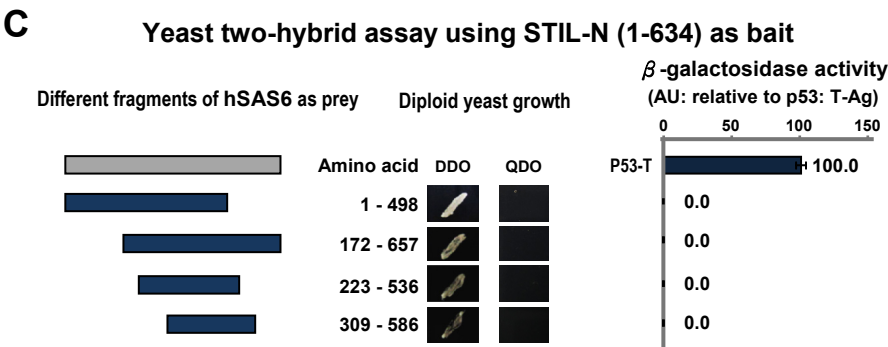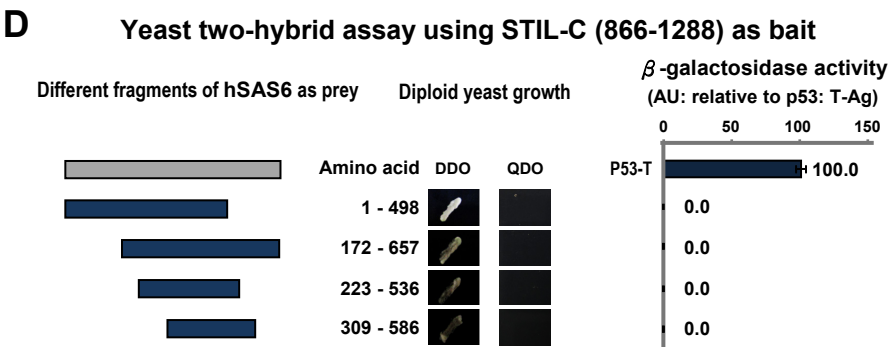

Fig. S4

A

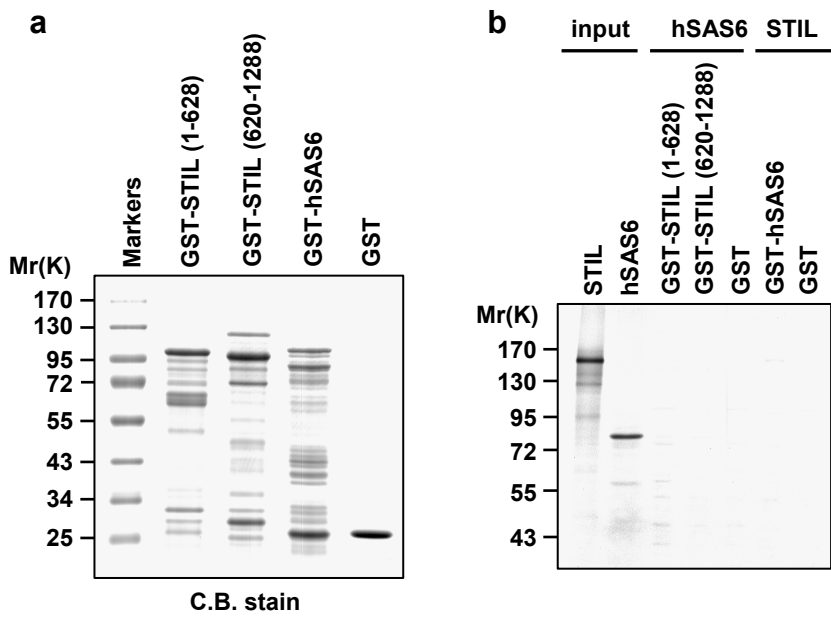

B

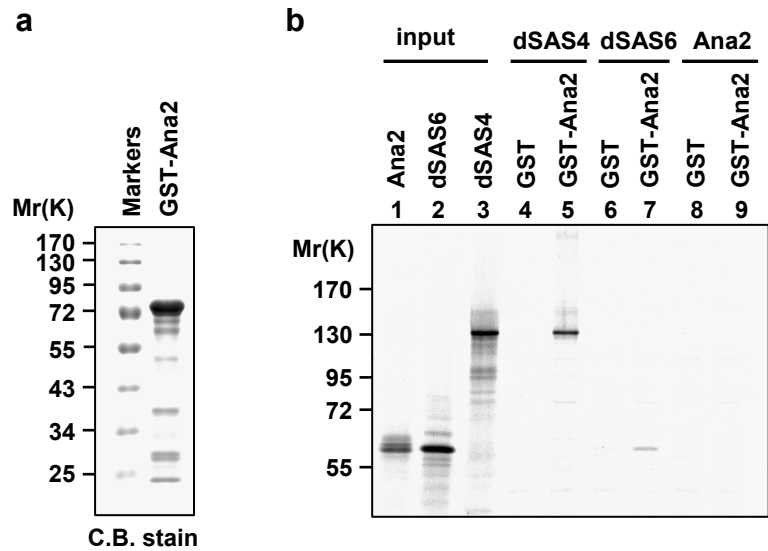

Fig. S5

A

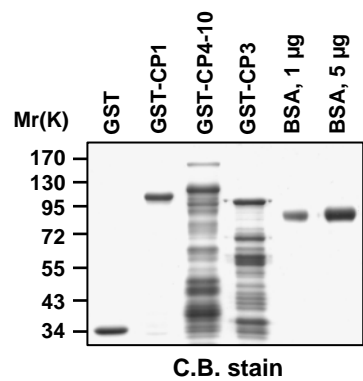

B

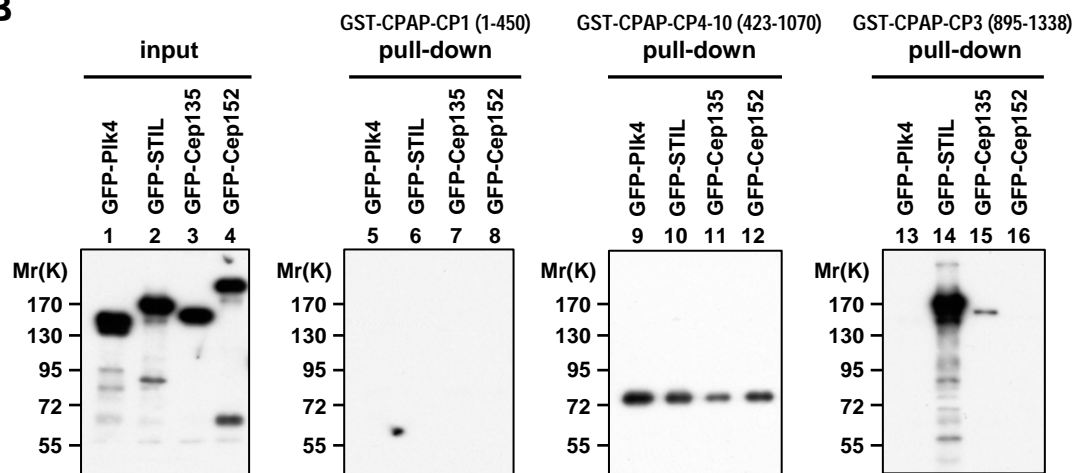

C

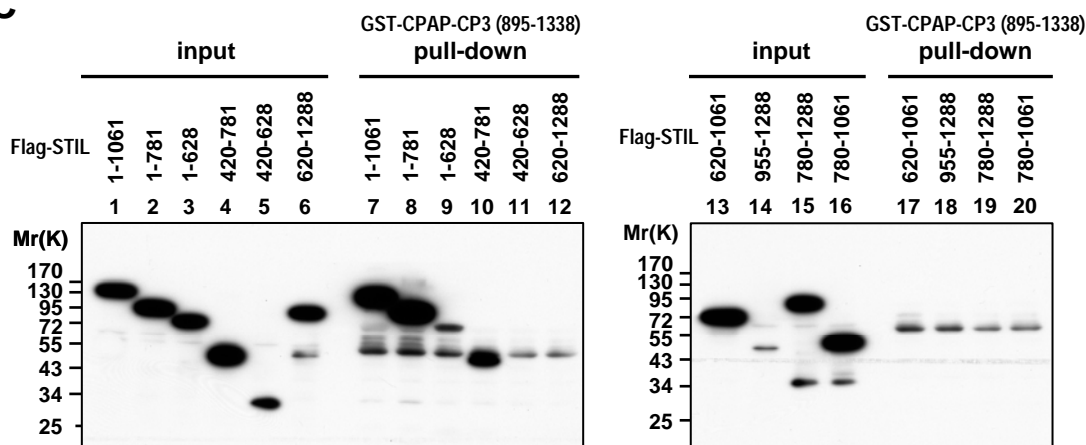

Fig. S6

A

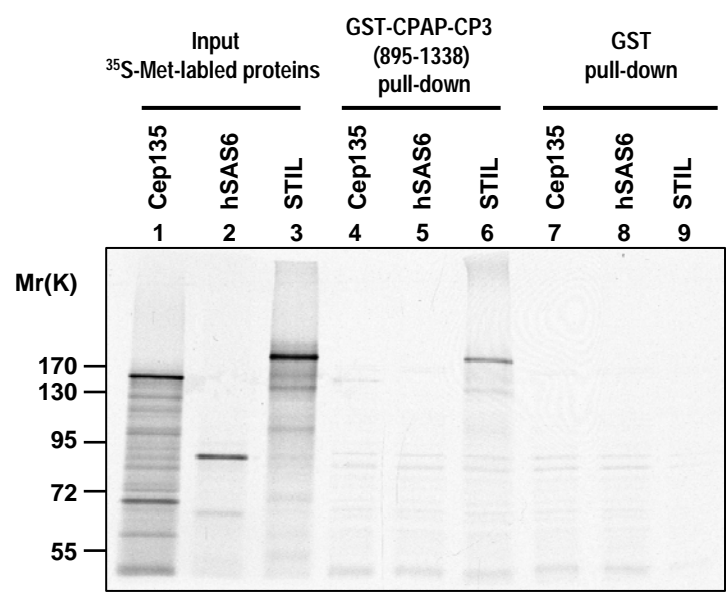

B

Yeast two-hybrid assay using CPAP-CP3 (895-1338) as bait

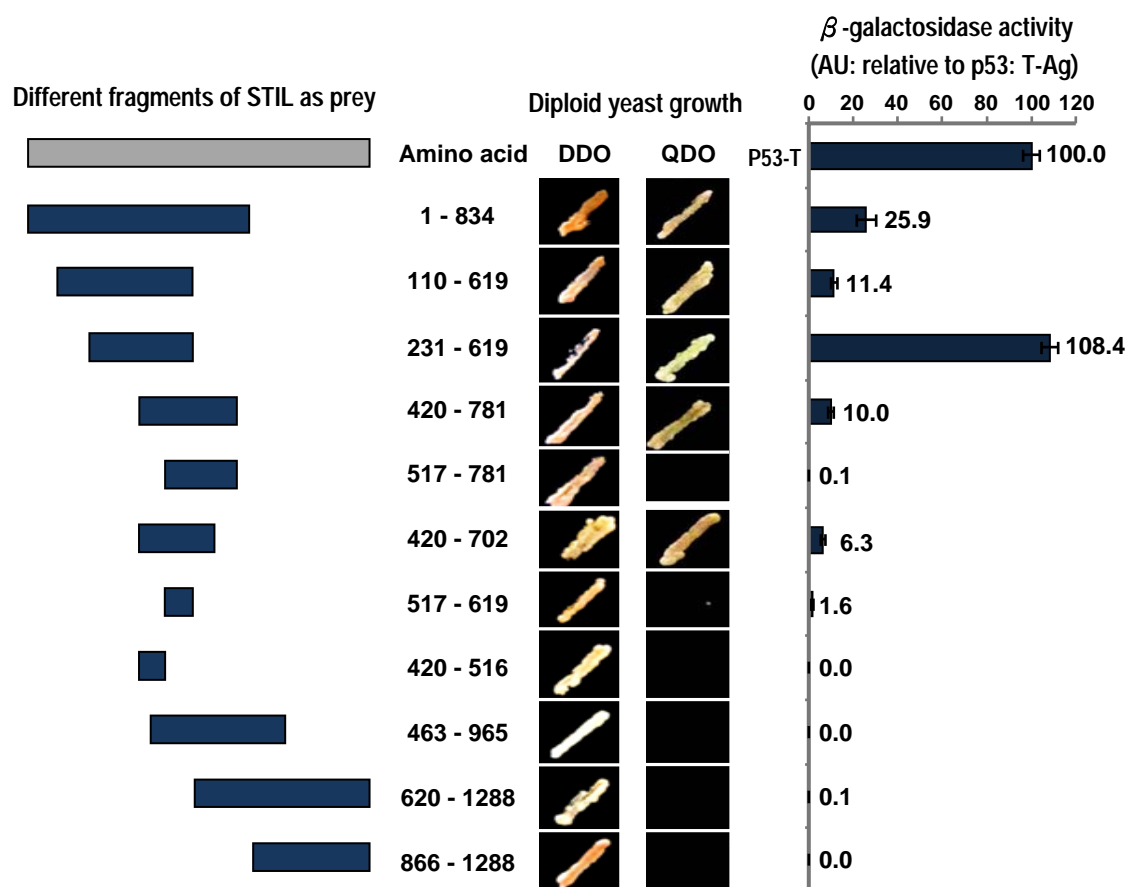

**Fig. S7**

**A**

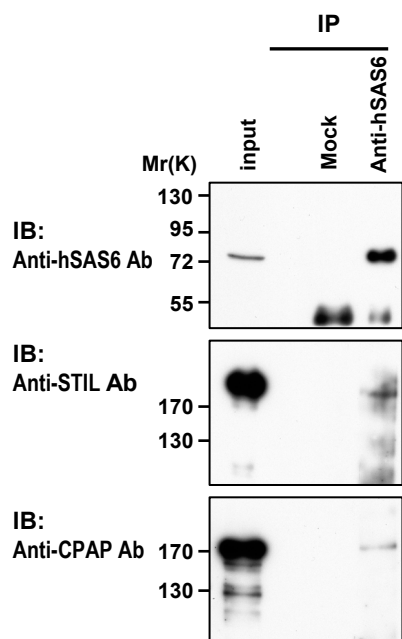

**B**

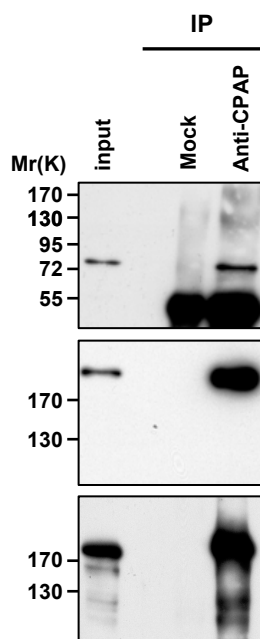

**C**

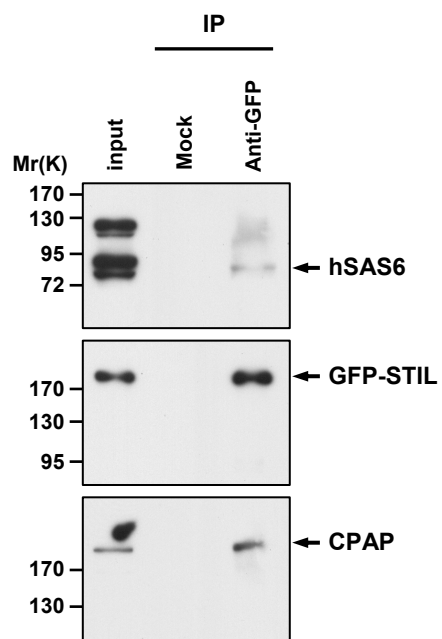

Fig. S8

Yeast two-hybrid assay using CPAP-CP3 (895-1338) (wt or E1235V) as bait

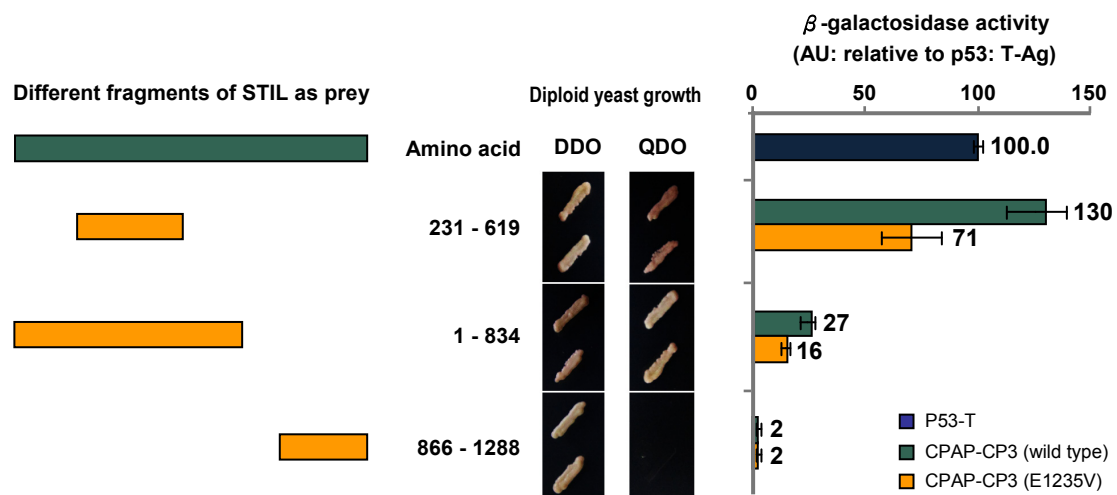

Fig. S9

A

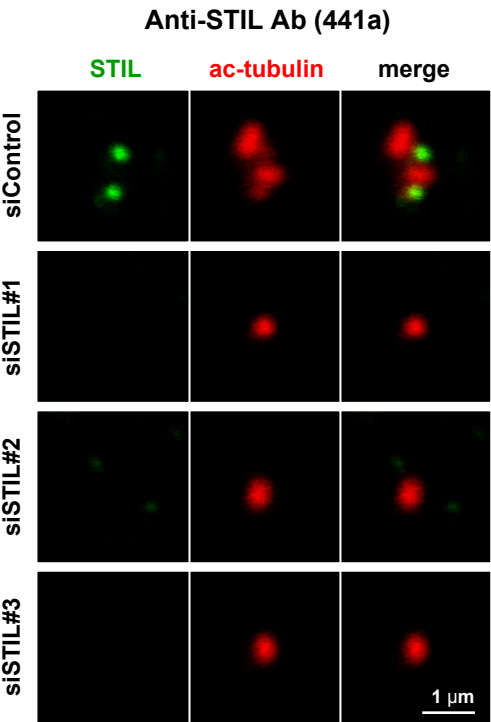

B

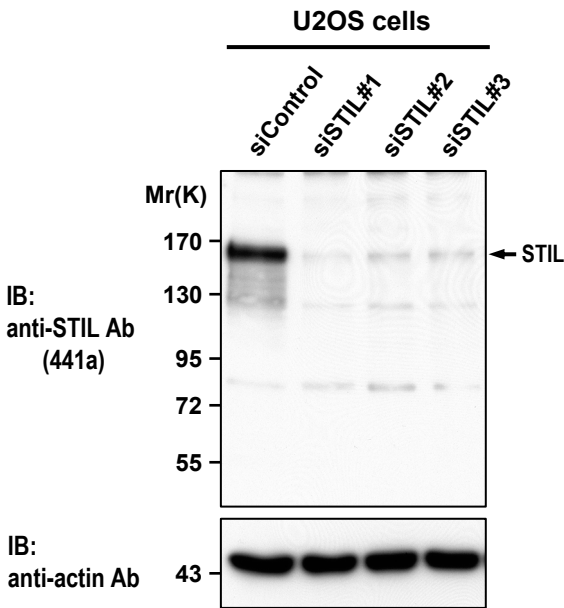

C

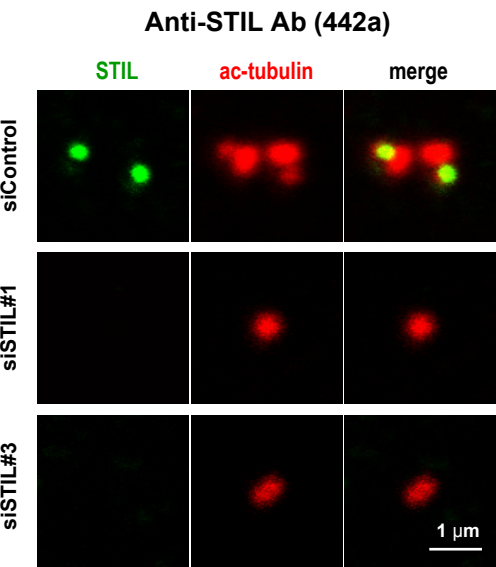

Fig. S10

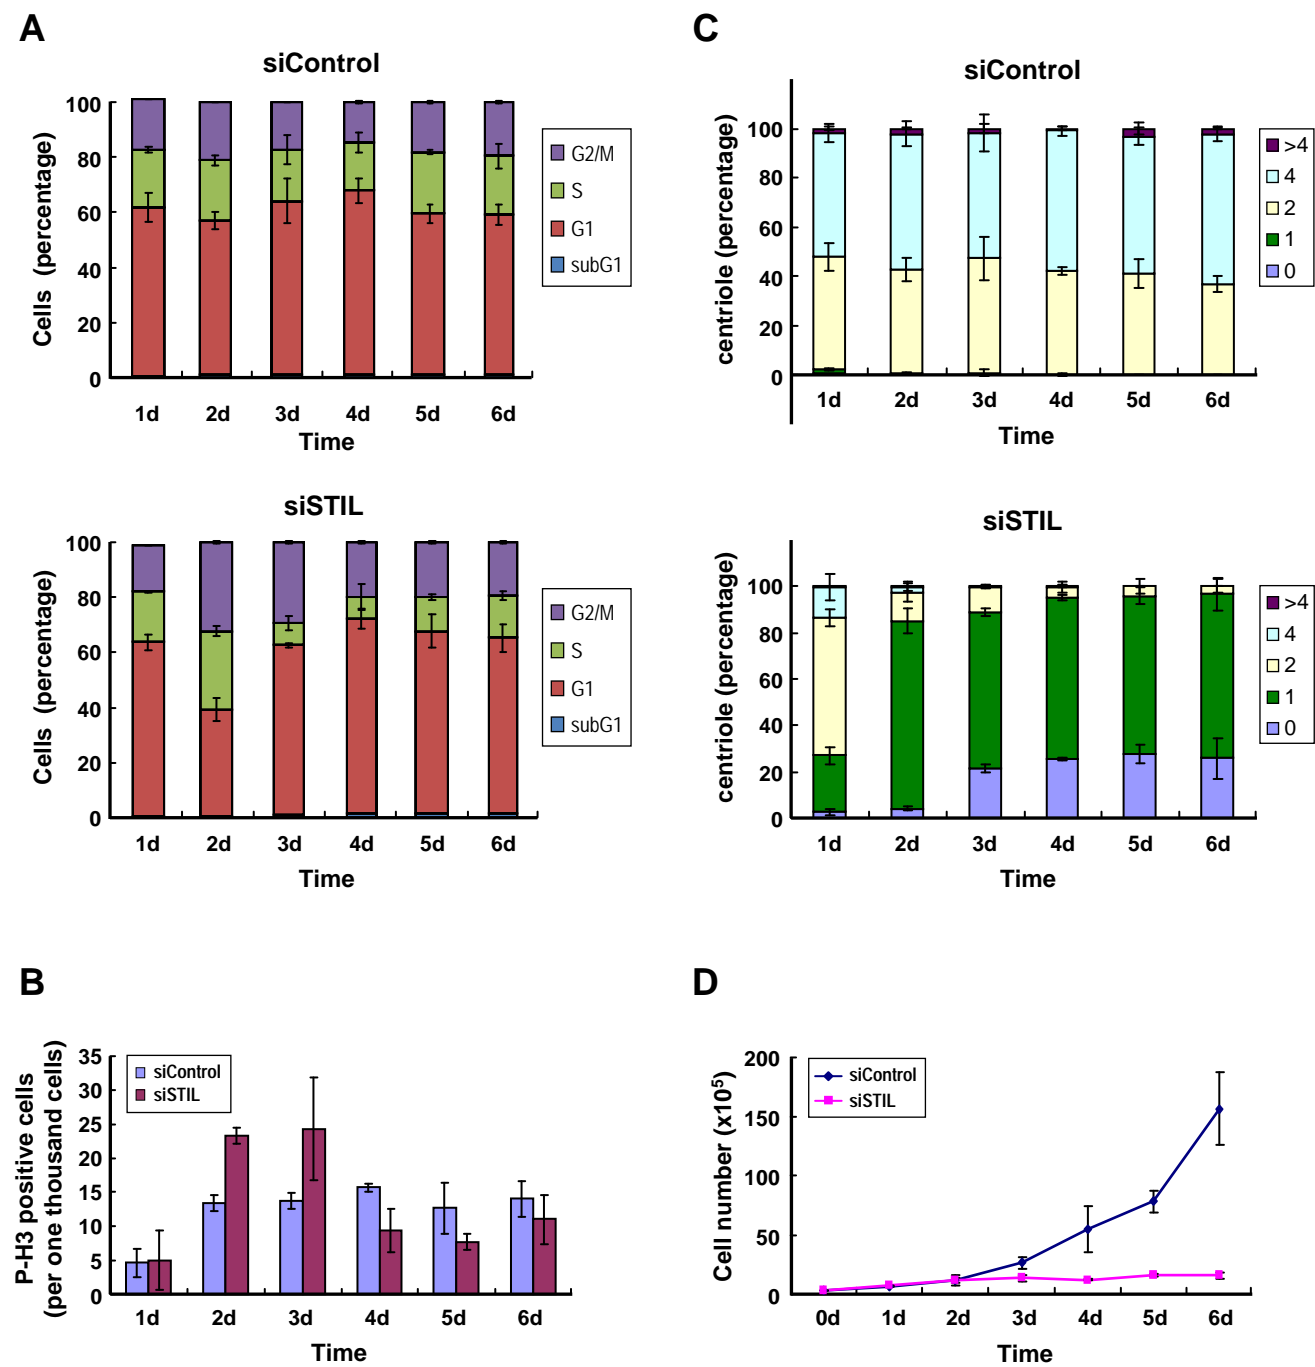

Fig. S11

A

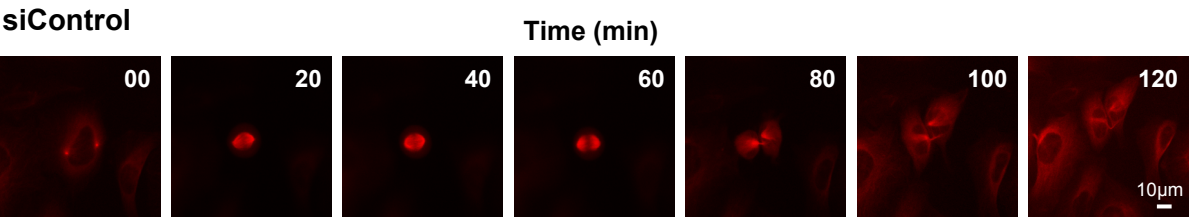

B

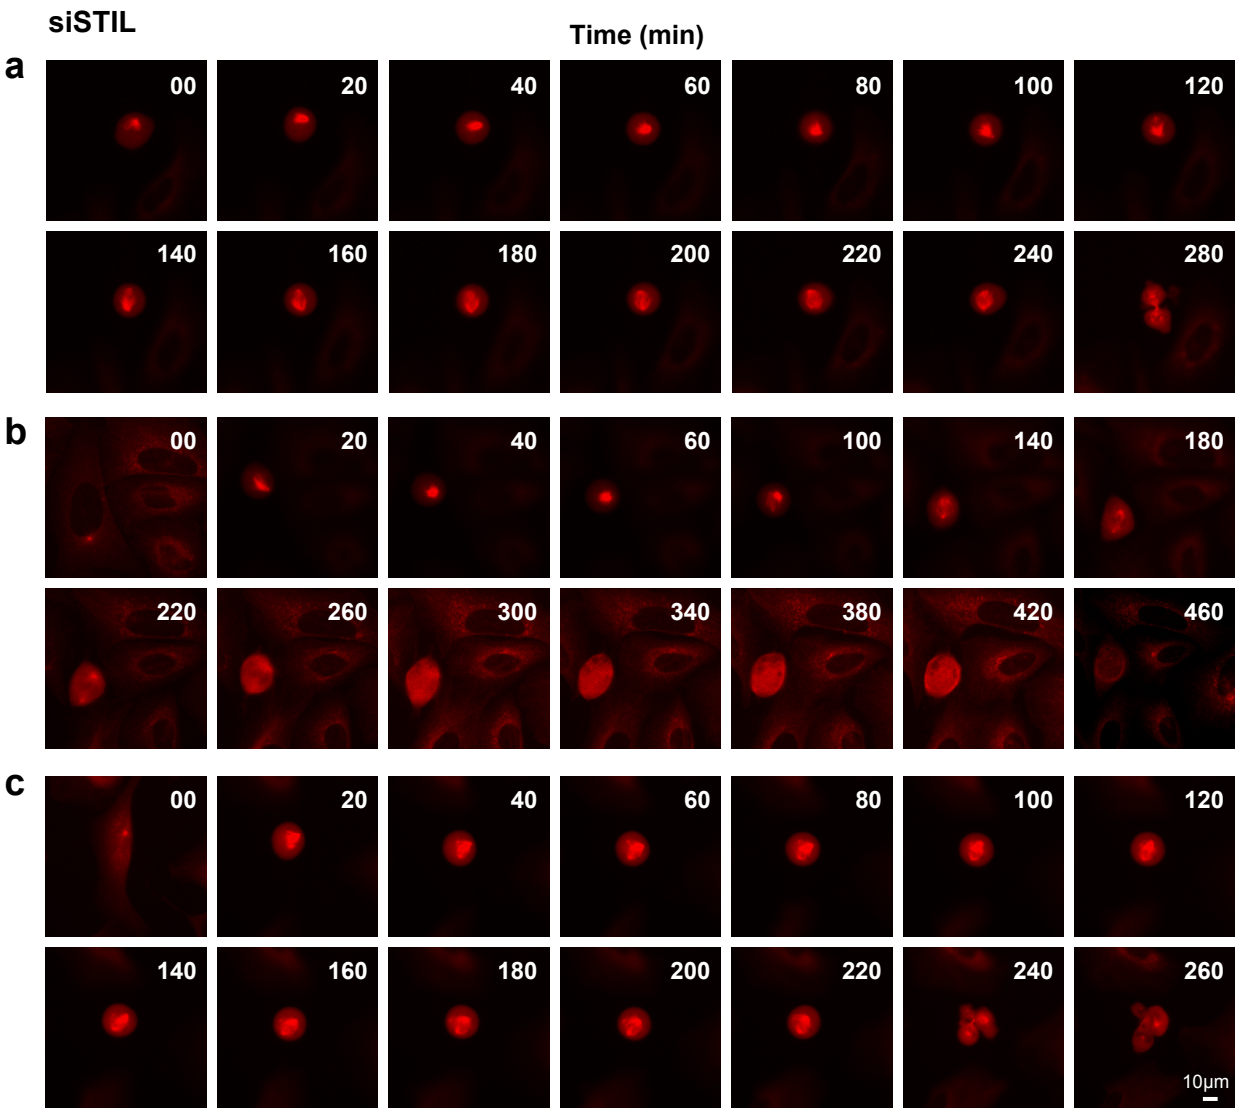

Fig. S12

A

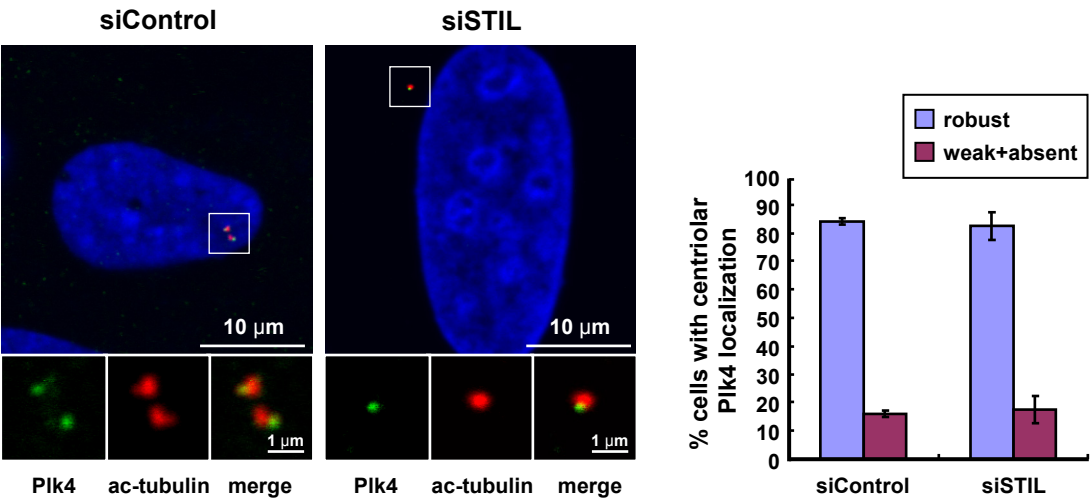

B

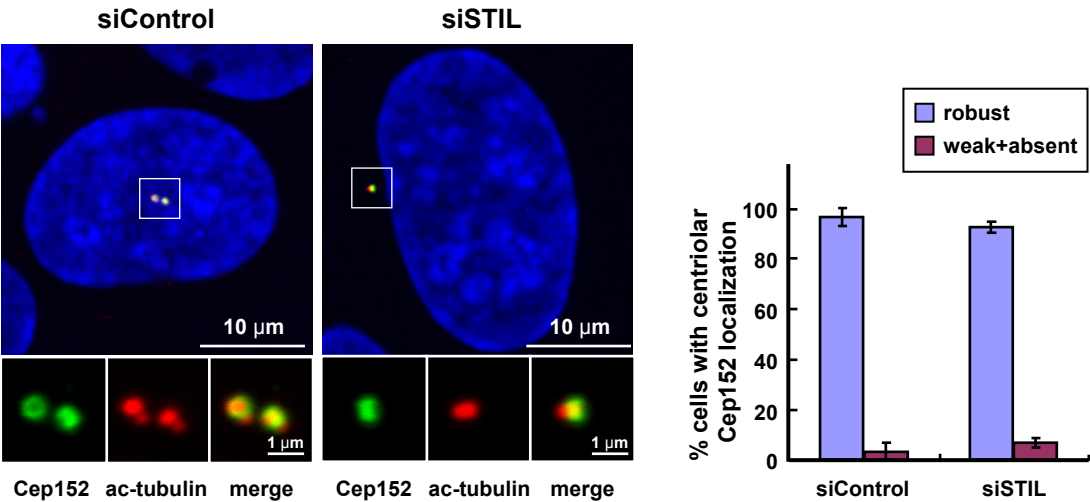

Fig. S13

A

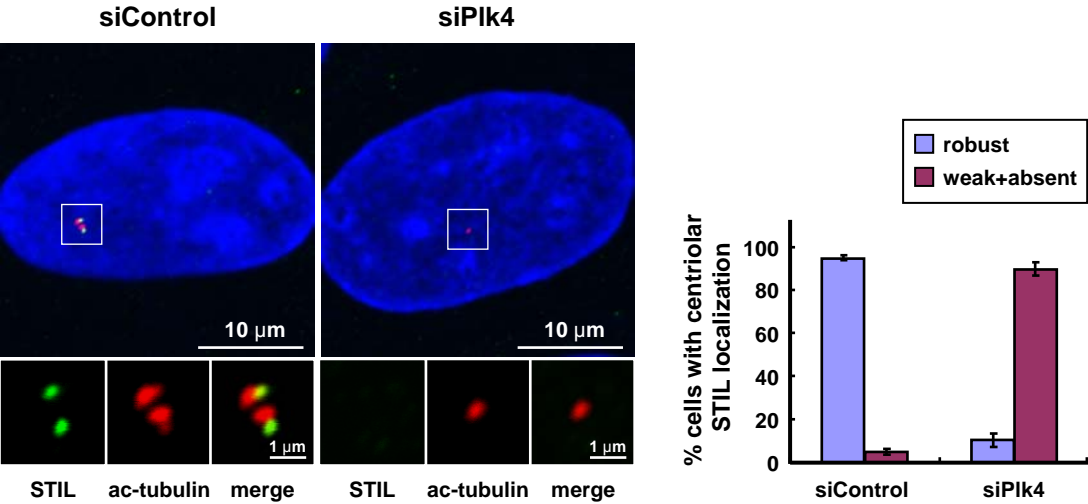

B

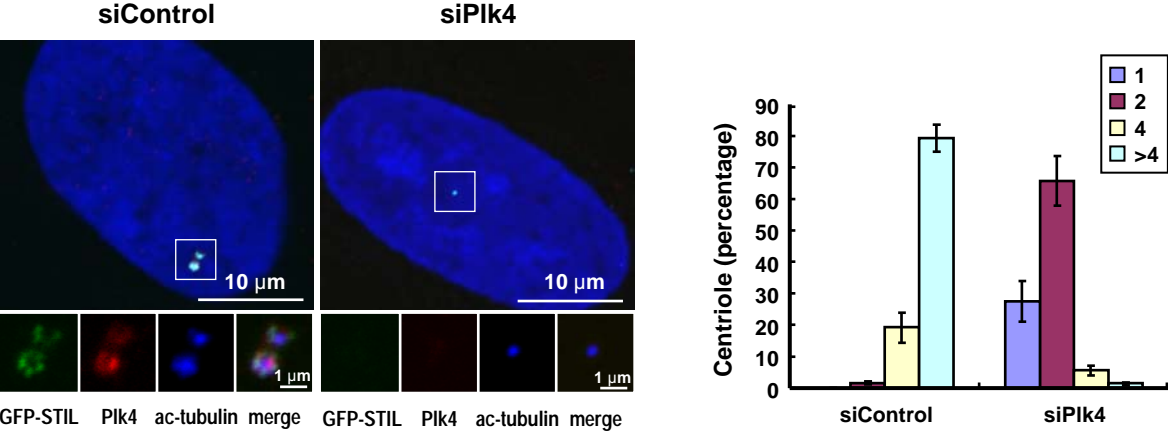

Fig. S14

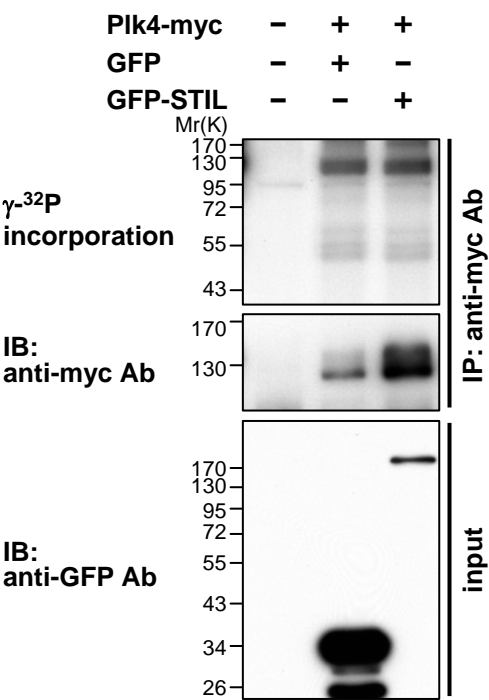

Supplement: emboj2011378s1.pdf [file emboj2011378s1.pdf]
