# Supplementary material
Source: PubMed Central journal article supplement (PMC3243611)
Supplement: emboj2011378s5.pdf [file emboj2011378s5.pdf]

Manuscript EMBO-2011-77973

## **The human microcephaly protein STIL interacts with CPAP and is required for procentriole formation**

Chieh-Ju Tang, Shin-Yi Lin, Wen-Bin Hsu, Yi-Nan Lin, Chien-Ting Wu, Yu-Chih Lin, Ching-Wen Chang, Kuo-Sheng Wu, Tang Tang

*Corresponding author: Tang Tang, Academia Sinica, Taipei, Taiwan*

---

**Review timeline:**

Submission date:

24 April 2011

Accepted:

27 September 2011

---

No Peer Review Process File is available with this article, as the authors have chosen not to make the review process public in this case.
